# Supplementary material for: A randomized controlled pilot study of inflammatory gene expression in response to a stress management intervention for stem cell transplant caregivers
Source: Springer Nature journal article supplement (doi:10.1007/s10865-015-9709-3), 2016-01-05
Supplement: MOESM1 [file 6928532]

| **Supporting Information Table 1 - Genes showing differential change in expression over time in PEPRR intervention group vs TAU controls** | |
| --- | --- |
|  |  |
| Gene Symbol | Fold difference for Group X Time interaction* |
|  |  |
| **Upregulated transcripts** | |
|  |  |
| LOC100133465 | 3.752 |
| SAR1B | 3.664 |
| LOC100132564 | 3.583 |
| CCDC125 | 3.528 |
| GSR | 3.397 |
| TMSB4X | 3.196 |
| LOC100133876 | 3.094 |
| F2R | 2.762 |
| LOC642393 | 2.745 |
| RPL7L1 | 2.564 |
| LOC100133607 | 2.503 |
| LOC729603 | 2.455 |
| LOC100133649 | 2.376 |
| KIF1B | 2.371 |
| LOC100132593 | 2.316 |
| LOC651483 | 2.288 |
| LOC643031 | 2.236 |
| LOC100133177 | 2.233 |
| CLUAP1 | 2.213 |
| HBB | 2.208 |
| LOC645895 | 2.193 |
| RN7SL1 | 2.131 |
| PP8961 | 2.115 |
| LOC728672 | 2.111 |
| PPIL3 | 2.053 |
| LOC100129543 | 2.048 |
| LOC728687 | 2.019 |
| SNHG10 | 2.016 |
| C21orf55 | 1.969 |
| LOC644316 | 1.921 |
| DMC1 | 1.895 |
| FARSLB | 1.883 |
| ZNF652 | 1.855 |
| NAG18 | 1.824 |
| LOC389787 | 1.778 |
| LOC642567 | 1.762 |
| FKSG44 | 1.739 |
| MIR574 | 1.735 |
| LOC100131349 | 1.730 |
| ALG8 | 1.716 |
| LOC646996 | 1.687 |
| FKTN | 1.666 |
| ATAD3C | 1.646 |
| CRCP | 1.620 |
| LOC285900 | 1.618 |
| LOC255167 | 1.613 |
| MIR886 | 1.608 |
| LOC100129502 | 1.586 |
| LOC100129742 | 1.560 |
| MSH3 | 1.557 |
| KIAA0101 | 1.555 |
| RPS10 | 1.549 |
| DAZAP2 | 1.547 |
| FKBP5 | 1.547 |
| SMCR5 | 1.542 |
| LOC100133812 | 1.525 |
| LOC100133565 | 1.512 |
|  |  |
| **Downregulated transcripts** | |
|  |  |
| LOC100133568 | 0.379 |
| LOC100132585 | 0.394 |
| LOC100008588 | 0.395 |
| TRIM16L | 0.479 |
| BMS1P5 | 0.515 |
| LOC100128859 | 0.516 |
| MGC16703 | 0.532 |
| BCYRN1 | 0.535 |
| LOC100128505 | 0.547 |
| MRPL44 | 0.548 |
| GCA | 0.553 |
| C17orf86 | 0.553 |
| PPA2 | 0.563 |
| RRP7B | 0.564 |
| C6orf48 | 0.565 |
| LOC100130824 | 0.572 |
| GTF2IRD2P | 0.584 |
| LOC642617 | 0.589 |
| SLC16A12 | 0.591 |
| OCIAD1 | 0.594 |
| LOC100190938 | 0.597 |
| LOC100132391 | 0.597 |
| LOC728624 | 0.598 |
| LOC100128276 | 0.600 |
| DEFA3 | 0.608 |
| LOC388720 | 0.609 |
| RN7SK | 0.609 |
| LOC100133775 | 0.618 |
| LOC202781 | 0.627 |
| HBA1 | 0.629 |
| TPM3 | 0.640 |
| LOC650843 | 0.641 |
| LOC100128693 | 0.643 |
| MCART1 | 0.644 |
| EIF2AK4 | 0.645 |
| ZMAT3 | 0.647 |
| ORC6L | 0.650 |
| RPE | 0.650 |
| MAT2A | 0.654 |
| SNRPG | 0.654 |
| LOC100132394 | 0.655 |
| LOC100128461 | 0.656 |
| FAM175A | 0.659 |
| LOC100130053 | 0.660 |
| DUSP1 | 0.661 |
| C9orf80 | 0.661 |
| LOC645899 | 0.663 |
|  |  |
| * values represent exponentiated linear model Group x Time interaction parameter estimate | |
